# Supplementary material for: Surface plasmon enhanced photoluminescence from porous silicon nanowires decorated with gold nanoparticles
Source: Royal Society of Chemistry journal article supplement (doi:10.1039/c6ra06019f), 2016-01-01
Supplement: c6ra06019f1.pdf [file c6ra06019f1.pdf]

*Supplementary Information*

**Surface plasmon enhanced photoluminescence from porous silicon  
nanowires decorated with gold nanoparticles**

*Haiping Tang<sup>a,\*</sup>, Chao Liu<sup>b</sup>, Haiping He<sup>b</sup>*

*<sup>a</sup>College of Mechanical Engineering, Baoji University of Arts and Sciences, Baoji 721007, China*

*<sup>b</sup>School of Materials Science and Engineering, Zhejiang University, Hangzhou 310027, China*

\*Corresponding author. Email: [thp315@163.com](mailto:thp315@163.com)

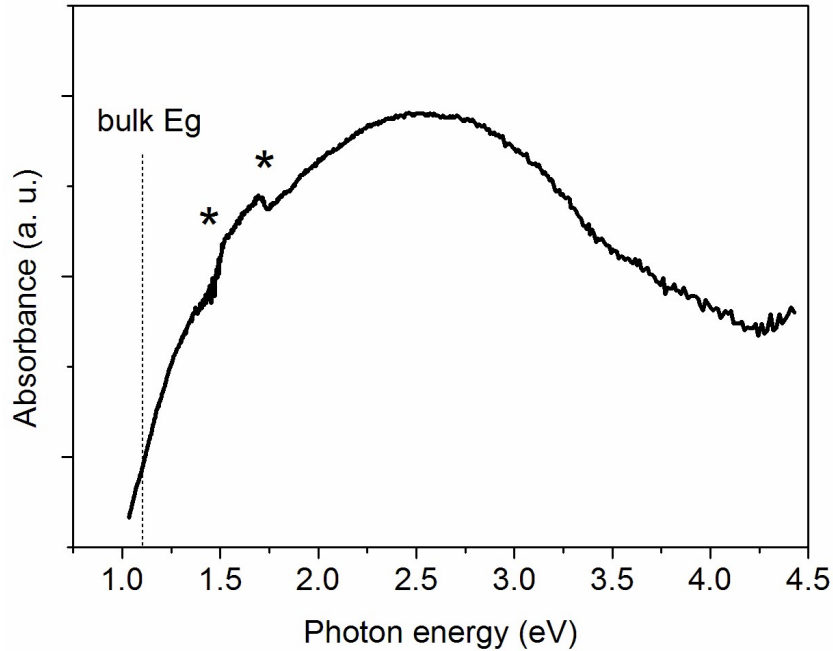

**Figure S1.** Optical absorption spectrum of porous Si nanowires. The nanowires were scratched from the wafer and distributed in ethanol for measurement. The sudden changes labelled by \* symbol is due to equipment artifact. We find the absorption can be divided into two regions regarding the slope. The first one in the range of 1.1-1.35 eV is abrupt (but still milder than that of bulk Si), while the increase of the second one ( $\sim$ 1.35-2.5 eV) is much milder. We suggest the two regions result from the large (bulk-like) and small Si nanocrystals, respectively. The mild and broad absorption is a result of the size (hence the bandgap) distribution of Si nanocrystals.

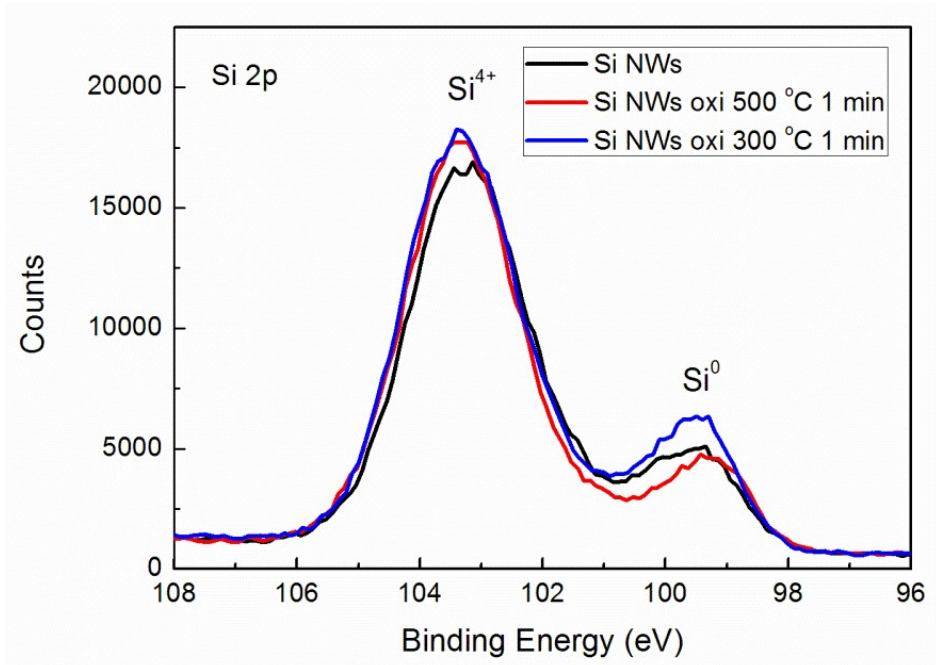

**Figure S2.** XPS Si2p core level spectra of the porous Si nanowires before and after oxidation at 300 and 500°C. The peak at 103.1 and 99.4 eV is attributed to Si<sup>4+</sup> in SiO<sub>2</sub> and Si<sup>0</sup>, respectively. Because XPS collect signals from the very surface of less than 3-5 nm, and the nanowire surface is very rough, the three curves show not much different. In this regard, the thickness of SiO<sub>x</sub> layer is hard to be determined. We also note that for such nanowire assembly with rough surface, XPS depth profile is not reliable.

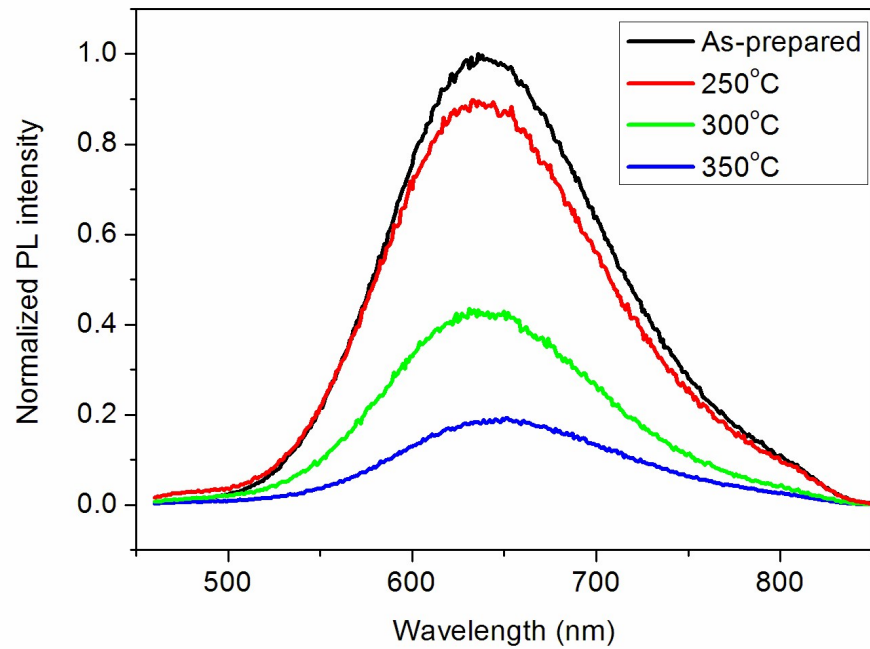

**Figure S3.** PL spectra of the as-prepared and thermally treated porous Si nanowires. The thermal treatment in oxygen, hence the formation of SiO<sub>2</sub> layer, results in decrease of PL with increasing temperature.
